# Supplementary material for: A retrospective analysis of real-world use of the eaTracker® My Goals website by adults from Ontario and Alberta, Canada
Source: PubMed Central journal article supplement (PMC5024431; doi:10.1186/s12889-016-3640-6), 2016-09-15
Supplement: 12889_2016_3640_MOESM2_ESM.pdf [file 12889_2016_3640_MOESM2_ESM.pdf]

Additional File 2: eaTracker® My Goals feature and EatRight Ontario motivational messaging sample screenshots

Main eaTracker® login page (<http://www.eaTracker.ca/>)

**eaTracker.ca**  
Brought to you by Dietitians of Canada

Help Français Connect

Not a Member? Sign Up Login

BMI Weight Analyzer Food Search Activity Search Recipe Analyzer

# eaTracker

Use eaTracker to check your food and activity choices, analyze your recipes and plan your meals. [Sign up](#) to set goals and track your progress.

Plan Your Meals Analyze Your Food Track Your Activities Meet Your Goals

### Featured Recipes

- Roasted vegetables pasta**  
Cal: 313  
Fat: 9.2g
- Peachy Buckwheat Muffins**  
Cal: 313  
Fat: 7.6g
- Banana-Berry Wake-Up Shake**  
Cal: 231  
Fat: 4.6g

### Featured Exercises

- Yoga**  
Yoga is especially good for stress reduction.
- Running**  
Running counts as a vigorous intensity activity.
- Pilates**  
Pilates targets all muscle groups.

### Featured Tips

- Meal Planning**  
A weekly meal plan can cut down on trips to the grocery store.
- Healthy Weight**  
Balance your food intake with your daily activities...
- Healthy Eating**  
A single meal or day of eating rich foods will not...

© 2016 Dietitians of Canada [www.eaTracker.ca](http://www.eaTracker.ca)

 Brought to you by Dietitians of Canada

[? Help](#) [Français](#) [Connect](#) [Logout](#)

My Profile | My Food | My Activities | My Recipes | My Coach

Fri May 23

|          |     |         |               |               |                          |                              |
|----------|-----|---------|---------------|---------------|--------------------------|------------------------------|
| Calories | Fat | Protein | Carbohydrates | Activity Time | Activity Calories Burned | Weight                       |
| 0        | 0g  | 0g      | 0g            | 0min          | 0                        | <input type="text"/> kgs lbs |

- My Dashboard
- My Goals**
- My Eating Targets
- My Motivations
- My Messages
- My Details
- My BMI
- My Account
- Customize Dashboard

### My Goals

Welcome to eaTracker **Goal Tracking Tool!** Setting goals and tracking progress is an important part of starting and keeping up a healthy lifestyle.

Use MY GOALS to:

- set goals for yourself
- track and view your progress
- see the goals you have achieved

### Add A Goal

Choose a ready-made goal from the drop-down list.

OR

Write your own SMART goal. SMART stands for: [i](#)

- Specific
- Measurable
- Action-oriented
- Realistic
- Time-framed

We recommend that you select 1 to 3 goals.

Check the [My Messages](#) tab for your weekly motivational reminders from EatRight Ontario.

Ready-Made Goals  Write Your Own Goal

Get answers to your nutrition & healthy eating questions from Registered Dietitians for free.

 EatRight Ontario

1-877-510-510-2  
www.eatrightontario.ca

## Ready-Made Goal Setting

### Add A Goal

Choose a ready-made goal from the drop-down list.

OR

Write your own SMART goal. SMART stands for: [i](#)

- Specific
- Measurable**
- Action-oriented
- Realistic
- Time-framed

We recommend that you select 1 to 3 goals.

Check the [My Messages](#) tab for your weekly motivational reminders from EatRight Ontario.

Ready-Made Goals  Write Your Own Goal

Please select a category

or [Cancel](#)

© 2016 Dietitians of Canada www.eaTracker.ca

## Write Your Own Goal Setting

### Add A Goal

Choose a ready-made goal from the drop-down list.

OR

Write your own SMART goal. SMART stands for: [i](#)

- Specific
- Measurable**
- Action-oriented
- Realistic
- Time-framed

We recommend that you select 1 to 3 goals.

Check the [My Messages](#) tab for your weekly motivational reminders from EatRight Ontario.

Ready-Made Goals  Write Your Own Goal

Enter your custom goal here

Ongoing    Specific Date End

or [Cancel](#)

© 2016 Dietitians of Canada www.eaTracker.ca

# Goal Tracking

 **eaTracker.ca**  
Brought to you by Dietitians of Canada

Help Français Connect Logout

| My Profile |        | My Food  |     | My Activities |               | My Recipes    |                          | My Coach             |         |
|------------|--------|----------|-----|---------------|---------------|---------------|--------------------------|----------------------|---------|
| Fri        | May 23 | Calories | Fat | Protein       | Carbohydrates | Activity Time | Activity Calories Burned | Weight               |         |
|            |        | 0        | 0g  | 0g            | 0g            | 0min          | 0                        | <input type="text"/> | kgs lbs |

My Dashboard  
My Goals  
My Eating Targets  
My Motivations  
My Messages  
My Details  
My BMI  
My Account  
Customize Dashboard

Enter today's meals

Enter today's activities

### My Goals Tracker

Below is the list of goals you are currently working on. Click on the buttons beside each goal to record how you are doing.

 Weekly my goal is to Eat a dark green vegetable every day this week (e.g. spinach, broccoli, Romaine lettuce, bok choy, swiss chard).

Met My Goal  
Still Trying  
Remove Goal

 Weekly my goal is to Eat one meal with legumes (e.g. dried beans, peas or lentils) this week.

Met My Goal  
Still Trying  
Remove Goal

 Weekly my goal is to Have fish (e.g. salmon, trout, sole, halibut) 2 times this week.

Met My Goal  
Still Trying  
Remove Goal

Get answers to your nutrition & healthy eating questions from Registered Dietitians for free.

  
1-877-510-510-2  
www.eatrightontario.ca

## Manage My Goals

### Manage My Goals Hide

See the goals you are working on below. View your progress.



**Replace hot and cold sweetened coffee beverages with plain coffee made with 1 teaspoon of sugar and low fat milk.**  
Frequency : Weekly Hide

**Goal Completion History**

| Goal Date   | Met My Goal | Still Trying |
|-------------|-------------|--------------|
| 2014-May-20 | •           |              |



**Eat one meal with legumes (e.g. dried beans, peas or lentils) this week.**  
Frequency : Weekly History

© 2016 Dietitians of Canada www.eaTracker.ca

## My Success

### My Success Hide

Congratulations on your goal activity. See the goals you have reached.

|                                                                                                                                                                            | Number of times you met your goal |
|----------------------------------------------------------------------------------------------------------------------------------------------------------------------------|-----------------------------------|
|  <p><b>Eat one meal with legumes (e.g. dried beans, peas or lentils) this week.</b></p> | 2                                 |

© 2016 Dietitians of Canada www.eaTracker.ca

## EatRight Ontario motivational messaging

### Sample email message

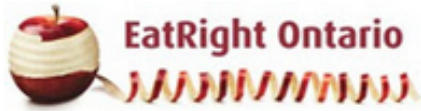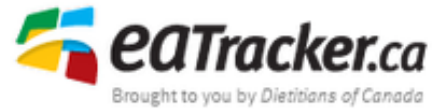

EatRight Ontario and eaTracker are here to help motivate you to reach your healthy eating and physical activity goals!

**Your goal:** Eat a dark green vegetable every day this week (e.g. spinach, broccoli, Romaine lettuce, bok choy, swiss chard).

**Tip:** To help you eat a dark green vegetable every day this week, add fresh or frozen chopped greens to vegetable soups, stews or chili.

Login to your [www.eatracker.ca](http://www.eatracker.ca) account and track your progress!

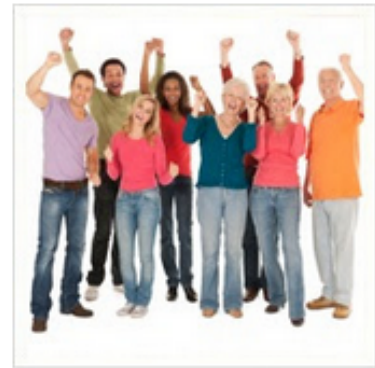

#### Quick Links

[EatRight Ontario](#)

[My Menu Planner](#)

[Email a Dietitian](#)

If you have additional questions about nutrition or healthy eating please do not reply to this email instead:

- Call EatRight Ontario toll-free at [1-877-510-510-2](tel:1-877-510-510-2)
- Email a Dietitian from [www.eatrightontario.ca](http://www.eatrightontario.ca)

*You are receiving this email because you have registered for EatRight Ontario's motivational messages and tips to help you meet your goal. These messages are also found in the MY MESSAGES section of [www.eatracker.ca](http://www.eatracker.ca) when you login to your account.*

Click [Here](#) to stop receiving motivational messages about this goal.

To log into eaTracker, please click [here](#)

© 2016 Dietitians of Canada [www.eatracker.ca](http://www.eatracker.ca)



[? Help](#)
[Français](#)
[Connect](#)

[Logout](#)

---

My Profile

Fri May 23

- ▶ My Dashboard
- ▶ My Goals
- ▶ My Eating Targets
- ▶ My Motivations
- ▶ My Messages
- ▶ My Details
- ▶ My BMI
- ▶ My Account
- ▶ Customize Dashboard

Get answers to your nutrition & healthy eating questions from Registered Dietitians for free.

My Food

Calories **0**

Fat **0g**

Protein **0g**

Carbohydrates **0g**

My Activities

Activity Time **0min**

My Recipes

Activity Calories Burned **0**

My Coach

Weight  kgs

lbs

## My Messages

If you have registered with EatRight Ontario, you will receive weekly motivational messages and tips about your goals. EatRight Ontario is here to support you!

My Messages

[Delete All Messages](#)

1 2 3 4 5 [▶](#)

**EatRight Ontario motivational message for you.**

**Your goal:** Eat a dark green vegetable every day this week (e.g. spinach, broccoli, Romaine lettuce, bok choy, swiss chard).

**Tip:** Try [Swiss Chard and Navy Bean Soup](#). It is delicious and is made with a nutritious dark green vegetable.

2014-MAY-25 9:00:05 AM

**EatRight Ontario motivational message for you.**

**Your goal:** Eat one meal with legumes (e.g. dried beans, peas or lentils) this week.

It can sometimes be hard to meet your healthy eating goals. The good news is that you are not alone! Call EatRight Ontario at 1-877-510-510-2 to speak to a Registered Dietitian. Let us keep you motivated!

2014-MAY-25 9:00:04 AM
