# Supplementary material for: A retrospective analysis of real-world use of the eaTracker® My Goals website by adults from Ontario and Alberta, Canada
Source: PubMed Central journal article supplement (PMC5024431; doi:10.1186/s12889-016-3640-6), 2016-09-15
Supplement: 12889_2016_3640_MOESM3_ESM.pdf [file 12889_2016_3640_MOESM3_ESM.pdf]

**Additional File 3:** Odds ratios from multivariate binary logistic regression analysis assessing the association between eaTracker® My Goals feature user demographics and types of goals set with the My Goals feature

|                      | Activity                      | Vegetables and Fruit          | Grain Products                | Milk and Alternatives         | Meat and Alternatives         | Fat, Sodium, Sugar, Unhealthy Foods | Breakfast                     | Water                         |
|----------------------|-------------------------------|-------------------------------|-------------------------------|-------------------------------|-------------------------------|-------------------------------------|-------------------------------|-------------------------------|
| <b>Sex</b>           |                               |                               |                               |                               |                               |                                     |                               |                               |
| Female               | 1.0                           | 1.0                           | 1.0                           | 1.0                           | 1.0                           | 1.0                                 | 1.0                           | 1.0                           |
| Male                 | <b>0.621</b><br>[0.533-0.723] | <b>0.726</b><br>[0.629-0.836] | <b>1.412</b><br>[1.098-1.817] | 1.192<br>[0.723-1.967]        | 1.028<br>[0.781-1.353]        | 0.983<br>[0.847-1.141]              | <b>1.644</b><br>[1.319-2.048] | 0.885<br>[0.615-1.273]        |
| Age                  | <b>0.995</b><br>[0.992-0.999] | 1.001<br>[0.997-1.004]        | <b>1.013</b><br>[1.006-1.020] | 1.002<br>[0.988-1.016]        | <b>1.015</b><br>[1.008-1.022] | 1.002<br>[0.998-1.006]              | <b>0.979</b><br>[0.973-0.986] | 0.995<br>[0.986-1.004]        |
| BMI                  | <b>1.011</b><br>[1.004-1.018] | <b>0.993</b><br>[0.986-1.000] | <i>0.984</i><br>[0.969-1.000] | <b>0.961</b><br>[0.929-0.994] | <b>0.952</b><br>[0.936-0.968] | 0.998<br>[0.990-1.006]              | <b>1.014</b><br>[1.001-1.027] | 1.005<br>[0.987-1.023]        |
| <b>Activity</b>      |                               |                               |                               |                               |                               |                                     |                               |                               |
| Sedentary            | 1.0                           | 1.0                           | 1.0                           | 1.0                           | 1.0                           | 1.0                                 | 1.0                           | 1.0                           |
| Low Active           | <b>0.809</b><br>[0.706-0.928] | 0.950<br>[0.824-1.096]        | 1.019<br>[0.747-1.390]        | 1.030<br>[0.555-1.913]        | 0.814<br>[0.616-1.077]        | 0.885<br>[0.756-1.035]              | <b>0.776</b><br>[0.606-0.995] | <b>0.690</b><br>[0.485-0.983] |
| Active               | <b>0.414</b><br>[0.351-0.489] | <i>0.852</i><br>[0.725-1.001] | 1.103<br>[0.784-1.552]        | 1.164<br>[0.603-2.249]        | <b>0.539</b><br>[0.387-0.749] | 0.869<br>[0.728-1.037]              | <b>0.611</b><br>[0.457-0.816] | 0.827<br>[0.558-1.226]        |
| Very Active          | <b>0.215</b><br>[0.146-0.317] | <b>0.660</b><br>[0.491-0.888] | 1.302<br>[0.761-2.226]        | 1.235<br>[0.453-3.365]        | 0.923<br>[0.559-1.525]        | <i>0.746</i><br>[0.542-1.027]       | <i>0.653</i><br>[0.397-1.074] | 0.614<br>[0.281-1.337]        |
| <b>Pregnant</b>      |                               |                               |                               |                               |                               |                                     |                               |                               |
| No                   | 1.0                           | 1.0                           | 1.0                           | 1.0                           | 1.0                           | 1.0                                 | 1.0                           | 1.0                           |
| Yes                  | <b>0.554</b><br>[0.346-0.888] | 1.350<br>[0.921-1.979]        | 0.788<br>[0.287-2.159]        | <b>3.630</b><br>[1.427-9.235] | 1.109<br>[0.481-2.558]        | 1.134<br>[0.729-1.764]              | 1.243<br>[0.622-2.483]        | 1.431<br>[0.575-3.563]        |
| <b>Breastfeeding</b> |                               |                               |                               |                               |                               |                                     |                               |                               |
| No                   | 1.0                           | 1.0                           | 1.0                           | 1.0                           | 1.0                           | 1.0                                 | 1.0                           | 1.0                           |
| Yes                  | 1.136<br>[0.781-1.652]        | 1.331<br>[0.926-1.912]        | 1.121<br>[0.487-2.577]        | 0.499<br>[0.068-3.668]        | 0.767<br>[0.310-1.899]        | 0.906<br>[0.583-1.410]              | 0.777<br>[0.359-1.682]        | 0.696<br>[0.218-2.217]        |

\*odds ratio could not be estimated.

**Bold** values are statistically significant (p<0.05); *italics* are borderline statistically significant (p value between 0.05 and 0.1)

Analysis encompassed multivariate binary logistic regression with goal type as the dependent variable (set goal type, did not set goal type). Sex, age, BMI, pregnancy, breastfeeding, and self-reported activity were independent variables. Analysis was conducted with SPSS version 23 (IBM corp, Armonk, NY). Analysis included n=7,979 users as it excluded n=88 users who had either an implausible BMI or an unspecified activity level.

|                      | Planning and Preparing Food   | Portion Control               | Calorie/Food Intake Amounts   | Eating Out                    | When/where foods are eaten    | Evening/night time eating      | Psychological Aspects of Eating | Alcohol                       |
|----------------------|-------------------------------|-------------------------------|-------------------------------|-------------------------------|-------------------------------|--------------------------------|---------------------------------|-------------------------------|
| <b>Sex</b>           |                               |                               |                               |                               |                               |                                |                                 |                               |
| Female               | 1.0                           | 1.0                           | 1.0                           | 1.0                           | 1.0                           | 1.0                            | 1.0                             | 1.0                           |
| Male                 | <b>0.753</b><br>[0.638-0.889] | 0.989<br>[0.847-1.155]        | 0.934<br>[0.634-1.376]        | 0.971<br>[0.722-1.306]        | <b>0.780</b><br>[0.671-0.907] | <b>0.335</b><br>[0.121-0.929]  | <b>0.121</b><br>[0.017-0.884]   | 2.027<br>[0.931-4.414]        |
| <b>Age</b>           | 0.996<br>[0.992-1.000]        | <b>1.014</b><br>[1.010-1.018] | <b>1.015</b><br>[1.005-1.025] | <b>0.982</b><br>[0.974-0.990] | <b>1.005</b><br>[1.002-1.009] | <b>1.024</b><br>[1.005-1.043]  | 0.999<br>[0.977-1.021]          | <b>1.052</b><br>[1.026-1.078] |
| <b>BMI</b>           | 1.003<br>[0.995-1.011]        | <b>1.016</b><br>[1.008-1.024] | 0.997<br>[0.976-1.018]        | <b>1.029</b><br>[1.015-1.043] | <b>1.014</b><br>[1.007-1.022] | 1.005<br>[0.970-1.041]         | 0.994<br>[0.949-1.041]          | 0.961<br>[0.908-1.018]        |
| <b>Activity</b>      |                               |                               |                               |                               |                               |                                |                                 |                               |
| Sedentary            | 1.0                           | 1.0                           | 1.0                           | 1.0                           | 1.0                           | 1.0                            | 1.0                             | 1.0                           |
| Low Active           | 0.899<br>[0.762-1.060]        | 1.080<br>[0.917-1.273]        | 0.957<br>[0.632-1.449]        | 0.927<br>[0.691-1.246]        | 1.143<br>[0.978-1.335]        | <b>0.511</b><br>[0.265-0.985]  | 0.933<br>[0.367-2.367]          | 1.553<br>[0.528-4.565]        |
| Active               | 0.923<br>[0.766-1.111]        | 1.044<br>[0.866-1.259]        | 1.057<br>[0.665-1.681]        | 0.739<br>[0.522-1.048]        | 1.131<br>[0.948-1.348]        | 0.786<br>[0.378-1.637]         | 1.380<br>[0.512-3.722]          | 0.615<br>[0.159-2.376]        |
| Very Active          | 0.943<br>[0.683-1.302]        | 0.808<br>[0.566-1.155]        | 1.457<br>[0.705-3.011]        | 0.525<br>[0.255-1.084]        | 0.760<br>[0.542-1.066]        | 1.461<br>[0.456-4.679]         | 0.706<br>[0.082-6.103]          | 1.832<br>[0.315-10.667]       |
| <b>Pregnant</b>      |                               |                               |                               |                               |                               |                                |                                 |                               |
| No                   | 1.0                           | 1.0                           | 1.0                           | 1.0                           | 1.0                           | .*                             | 1.0                             | .*                            |
| Yes                  | 1.432<br>[0.940-2.183]        | 0.978<br>[0.599-1.594]        | 0.777<br>[0.189-3.189]        | 0.538<br>[0.169-1.708]        | 0.627<br>[0.377-1.041]        | .*                             | 1.352<br>[0.181-10.077]         | .*                            |
| <b>Breastfeeding</b> |                               |                               |                               |                               |                               |                                |                                 |                               |
| No                   | 1.0                           | 1.0                           | 1.0                           | 1.0                           | 1.0                           | 1.0                            | 1.0                             | .*                            |
| Yes                  | 1.276<br>[0.847-1.922]        | 1.184<br>[0.765-1.834]        | 0.693<br>[0.169-2.844]        | 0.455<br>[0.144-1.443]        | 0.917<br>[0.597-1.409]        | <b>3.561</b><br>[1.077-11.778] | 1.250<br>[0.168-9.321]          | .*                            |

\*odds ratio could not be estimated.

**Bold** values are statistically significant (p<0.05); *italics* are borderline statistically significant (p value between 0.05 and 0.1)

Analysis encompassed multivariate binary logistic regression with goal type as the dependent variable (set goal type, did not set goal type). Sex, age, BMI, pregnancy, breastfeeding, and self-reported activity were independent variables. Analysis was conducted with SPSS version 23 (IBM corp, Armonk, NY). Analysis included n=7,979 users as it excluded n=88 users who had either an implausible BMI or an unspecified activity level.

|                      | <b>Self-monitoring</b>        | <b>Eat more of certain nutrients</b> | <b>Eat less of certain nutrients</b> | <b>Follow Canada's Food Guide Misc</b> | <b>Generic Healthy Eating</b> |
|----------------------|-------------------------------|--------------------------------------|--------------------------------------|----------------------------------------|-------------------------------|
| <b>Sex</b>           |                               |                                      |                                      |                                        |                               |
| Female               | 1.0                           | 1.0                                  | 1.0                                  | 1.0                                    | 1.0                           |
| Male                 | 0.758<br>[0.408-1.409]        | <i>0.495</i><br>[0.236-1.037]        | 1.102<br>[0.503-2.411]               | 1.208<br>[0.848-1.722]                 | <b>0.696</b><br>[0.497-0.976] |
| <b>Age</b>           | 1.008<br>[0.993-1.024]        | 1.006<br>[0.991-1.022]               | <b>1.034</b><br>[1.012-1.057]        | 0.997<br>[0.987-1.007]                 | <b>1.010</b><br>[1.002-1.018] |
| <b>BMI</b>           | <b>1.050</b><br>[1.026-1.075] | <b>0.942</b><br>[0.905-0.981]        | 0.990<br>[0.944-1.038]               | 0.993<br>[0.974-1.014]                 | 0.988<br>[0.970-1.005]        |
| <b>Activity</b>      |                               |                                      |                                      |                                        |                               |
| Sedentary            | 1.0                           | 1.0                                  | 1.0                                  | 1.0                                    | 1.0                           |
| Low Active           | 0.790<br>[0.446-1.399]        | <i>0.568</i><br>[0.299-1.077]        | 0.721<br>[0.294-1.766]               | 1.043<br>[0.709-1.534]                 | 1.175<br>[0.822-1.678]        |
| Active               | 1.163<br>[0.608-2.226]        | 0.882<br>[0.456-1.710]               | 1.149<br>[0.440-3.001]               | <b>0.625</b><br>[0.392-0.994]          | 1.279<br>[0.865-1.891]        |
| Very Active          | 1.908<br>[0.670-5.435]        | 1.599<br>[0.643-3.977]               | 2.534<br>[0.686-9.369]               | 0.814<br>[0.379-1.747]                 | <b>2.259</b><br>[1.304-3.913] |
| <b>Pregnant</b>      |                               |                                      |                                      |                                        |                               |
| No                   | 1.0                           | 1.0                                  | 1.0                                  | 1.0                                    | 1.0                           |
| Yes                  | 0.798<br>[0.108-5.876]        | 1.606<br>[0.385-6.699]               | 2.340<br>[0.312-17.542]              | 1.323<br>[0.480-3.647]                 | 1.344<br>[0.582-3.100]        |
| <b>Breastfeeding</b> |                               |                                      |                                      |                                        |                               |
| No                   | 1.0                           | 1.0                                  | -*                                   | 1.0                                    | 1.0                           |
| Yes                  | 1.634<br>[0.390-6.837]        | 0.707<br>[0.096-5.185]               | -*                                   | 0.513<br>[0.125-2.101]                 | 0.766<br>[0.280-2.101]        |

\*odds ratio could not be estimated.

**Bold** values are statistically significant (p<0.05); *italics* are borderline statistically significant (p value between 0.05 and 0.1)

Analysis encompassed multivariate binary logistic regression with goal type as the dependent variable (set goal type, did not set goal type). Sex, age, BMI, pregnancy, breastfeeding, and self-reported activity were independent variables. Analysis was conducted with SPSS version 23 (IBM corp, Armonk, NY). Analysis included n=7,979 users as it excluded n=88 users who had either an implausible BMI or an unspecified activity level.

|                      | Weight loss                   | Weight gain                     | Weight maintenance/<br>management | Body<br>composition           | Disease<br>management         | Improve<br>fitness             | Be healthier                  |
|----------------------|-------------------------------|---------------------------------|-----------------------------------|-------------------------------|-------------------------------|--------------------------------|-------------------------------|
| <b>Sex</b>           |                               |                                 |                                   |                               |                               |                                |                               |
| Female               | 1.0                           | 1.0                             | 1.0                               | 1.0                           | 1.0                           | 1.0                            | 1.0                           |
| Male                 | <b>0.724</b><br>[0.608-0.862] | <b>11.003</b><br>[5.924-20.439] | <b>0.409</b><br>[0.219-0.761]     | <b>1.726</b><br>[1.228-2.426] | 1.251<br>[0.850-1.842]        | 1.211<br>[0.769-1.907]         | <i>0.511</i><br>[0.245-1.070] |
| <b>Age</b>           | <b>1.014</b><br>[1.010-1.018] | 0.998<br>[0.975-1.023]          | <b>1.031</b><br>[1.019-1.043]     | <b>0.981</b><br>[0.970-0.993] | <b>1.064</b><br>[1.051-1.077] | 0.992<br>[0.979-1.006]         | <b>1.020</b><br>[1.004-1.036] |
| <b>BMI</b>           | <b>1.025</b><br>[1.017-1.034] | <b>0.656</b><br>[0.592-0.727]   | <b>0.969</b><br>[0.942-0.997]     | <b>0.935</b><br>[0.905-0.965] | 1.006<br>[0.985-1.028]        | 0.995<br>[0.965-1.026]         | 1.012<br>[0.982-1.044]        |
| <b>Activity</b>      |                               |                                 |                                   |                               |                               |                                |                               |
| Sedentary            | 1.0                           | 1.0                             | 1.0                               | 1.0                           | 1.0                           | 1.0                            | 1.0                           |
| Low Active           | 1.142<br>[0.959-1.359]        | 0.752<br>[0.281-2.016]          | <b>2.445</b><br>[1.217-4.914]     | 1.024<br>[0.541-1.940]        | <b>0.639</b><br>[0.426-0.958] | 2.269<br>[0.962-5.353]         | 0.698<br>[0.374-1.303]        |
| Active               | <i>1.209</i><br>[0.991-1.475] | 0.752<br>[0.277-2.041]          | <b>2.843</b><br>[1.365-5.921]     | <b>2.657</b><br>[1.433-4.927] | 0.770<br>[0.479-1.236]        | <b>3.594</b><br>[1.495-8.636]  | 1.199<br>[0.611-2.353]        |
| Very Active          | 0.926<br>[0.630-1.360]        | 1.312<br>[0.402-4.281]          | 2.685<br>[0.924-7.800]            | <b>4.020</b><br>[1.955-8.265] | 1.658<br>[0.781-3.518]        | <b>9.133</b><br>[3.445-24.212] | 1.787<br>[0.615-5.197]        |
| <b>Pregnant</b>      |                               |                                 |                                   |                               |                               |                                |                               |
| No                   | 1.0                           | -*                              | 1.0                               | 1.0                           | 1.0                           | -*                             | -*                            |
| Yes                  | <b>0.233</b><br>[0.095-0.574] | -*                              | 0.555<br>[0.076-4.037]            | 0.377<br>[0.052-2.741]        | 2.488<br>[0.755-8.200]        | -*                             | -*                            |
| <b>Breastfeeding</b> |                               |                                 |                                   |                               |                               |                                |                               |
| No                   | 1.0                           | 1.0                             | 1.0                               | 1.0                           | 1.0                           | 1.0                            | -*                            |
| Yes                  | 1.333<br>[0.847-2.098]        | 3.052<br>[0.388-24.025]         | 0.517<br>[0.071-3.755]            | 1.450<br>[0.450-4.674]        | 1.395<br>[0.330-5.895]        | 0.624<br>[0.086-4.531]         | -*                            |

\*odds ratio could not be estimated.

**Bold** values are statistically significant (p<0.05); *italics* are borderline statistically significant (p value between 0.05 and 0.1).

Analysis encompassed multivariate binary logistic regression with goal type as the dependent variable (set goal type, did not set goal type). Sex, age, BMI, pregnancy, breastfeeding, and self-reported activity were independent variables. Analysis was conducted with SPSS version 23 (IBM corp, Armonk, NY). Analysis included n=7,979 users as it excluded n=88 users who had either an implausible BMI or an unspecified activity level.
